# Supplementary material for: Penicillin allergy status and its effect on antibiotic prescribing, patient outcomes and antimicrobial resistance (ALABAMA): protocol for a multicentre, parallel-arm, open-label, randomised pragmatic trial
Source: PubMed Central journal article supplement — BMJ Open. 2023 Sep 4;13(9):e072253. doi: 10.1136/bmjopen-2023-072253 (PMC10481831; doi:10.1136/bmjopen-2023-072253), 2023-09-04
Supplement: bmjopen-2023-072253supp003.pdf [file bmjopen-2023-072253supp003.pdf]

|                                                                                                                                                                                                                           |
|---------------------------------------------------------------------------------------------------------------------------------------------------------------------------------------------------------------------------|
| <b>APPENDIX A: ALABAMA Infections for which an antibiotic prescription would be considered a primary event, and subsequently assessed for primary trial outcome.</b>                                                      |
| Acute sore throat, pharyngitis, tonsillitis                                                                                                                                                                               |
| Oral infection                                                                                                                                                                                                            |
| Parotitis, salivary gland infection                                                                                                                                                                                       |
| Community acquired pneumonia                                                                                                                                                                                              |
| Chest infections i.e. 'acute bronchitis' or 'lower respiratory infection' or unspecified                                                                                                                                  |
| Acute otitis media                                                                                                                                                                                                        |
| Acute bacterial rhinosinusitis                                                                                                                                                                                            |
| Infective COPD exacerbation: amoxicillin or doxycycline first line unless patient at higher risk of treatment failure then co-amoxiclav; empirical treatment or guided by most recent sputum culture and susceptibilities |
| acute exacerbation of bronchiectasis                                                                                                                                                                                      |
| Skin and soft tissue infection (cellulitis, surgical wound infection, infected ulcer/pressure sore, erysipelas, boil, furuncle, impetigo etc)                                                                             |
| Diverticulitis                                                                                                                                                                                                            |
| Dental Abscesses                                                                                                                                                                                                          |
